# Supplementary material
Source: PubMed Central journal article supplement (PMC8380636)
Supplement: NIHMS1691580-supplement-1.pdf [file NIHMS1691580-supplement-1.pdf]

**eTable 1: Distribution of psychometric measure scores in SPEC**

| <b>Measure</b>            | <b>Score range</b> | <b>Score distribution in SPEC</b> |                        |                        |                        |                        |                        | <b>Maximum</b> |
|---------------------------|--------------------|-----------------------------------|------------------------|------------------------|------------------------|------------------------|------------------------|----------------|
|                           |                    | <b>Minimum</b>                    | <b>10th percentile</b> | <b>25th percentile</b> | <b>50th percentile</b> | <b>75th percentile</b> | <b>90th percentile</b> |                |
| Depressive symptoms       | 0-30               | 0                                 | 0                      | 2                      | 4                      | 8                      | 12                     | 27             |
| General anxiety           | 10-40              | 10                                | 11                     | 13                     | 16                     | 20                     | 23                     | 38             |
| Pregnancy-related anxiety | 7-28               | 7                                 | 8                      | 10                     | 13                     | 16                     | 21                     | 28             |
| Perceived stress          | 0-16               | 0                                 | 6                      | 7                      | 8                      | 9                      | 10                     | 16             |
| Stressful life events     | 0-11               | 0                                 | 0                      | 0                      | 1                      | 2                      | 4                      | 11             |
| Resilience                | 0-100              | 0                                 | 58                     | 67                     | 76                     | 86                     | 94                     | 100            |
| Friend and family support | 0-15               | 0                                 | 10                     | 11                     | 14                     | 15                     | 15                     | 15             |
| Partner support           | 0-15               | 0                                 | 9                      | 12                     | 14                     | 15                     | 15                     | 15             |

**eTable 2: Distribution of posterior probabilities of class membership**

| Latent class | Posterior probability |                 |                 |                 |                 |                 | Maximum |
|--------------|-----------------------|-----------------|-----------------|-----------------|-----------------|-----------------|---------|
|              | Minimum               | 10th percentile | 25th percentile | 50th percentile | 75th percentile | 90th percentile |         |
| Class 1      | 0.36                  | 0.66            | 0.85            | 0.89            | 0.92            | 0.95            | 1.00    |
| Class 2      | 0.39                  | 0.56            | 0.70            | 0.87            | 0.97            | 0.99            | 1.00    |
| Class 3      | 0.36                  | 0.66            | 0.85            | 0.97            | 1.00            | 1.00            | 1.00    |

**eTable 3: Fit indices for latent class analysis of adverse psychosocial factors**

| <b>Fit statistic</b>     | <b>Latent class model</b> |                |                |                |
|--------------------------|---------------------------|----------------|----------------|----------------|
|                          | <b>2 Class</b>            | <b>3 Class</b> | <b>4 Class</b> | <b>5 Class</b> |
| Log-likelihood           | -2214.4                   | -2193.2        | -2179.7        | -2168.9        |
| AIC                      | 293.4                     | 269.2          | 260.2          | 256.5          |
| BIC                      | 372.8                     | 390.6          | 423.6          | 461.9          |
| Sample-size adjusted BIC | 318.8                     | 308.0          | 312.5          | 322.2          |
| Entropy                  | 0.86                      | 0.66           | 0.73           | 0.78           |

Abbreviations: AIC=Akaike information criterion, BIC=Bayesian information criterion

**eTable 4: Conditional probabilities of latent class membership for a two-class model**

|                                                          | <b>Class 1</b>                                    | <b>Class 2</b>                                    |
|----------------------------------------------------------|---------------------------------------------------|---------------------------------------------------|
|                                                          | <b>Few adverse psychosocial factors<br/>n=690</b> | <b>Some adverse psychosocial factors<br/>n=97</b> |
| Depressive symptoms                                      |                                                   |                                                   |
| No probable depression (<13)                             | 0.93                                              | 0.51                                              |
| Probable depression (≥13)                                | 0.07                                              | 0.49                                              |
| General anxiety                                          |                                                   |                                                   |
| Moderate/low symptomology (<90 <sup>th</sup> percentile) | 0.88                                              | 0.39                                              |
| High symptomology (≥90 <sup>th</sup> percentile)         | 0.12                                              | 0.61                                              |
| Pregnancy-related anxiety                                |                                                   |                                                   |
| Moderate/low symptomology (<90 <sup>th</sup> percentile) | 0.89                                              | 0.70                                              |
| High symptomology (≥90 <sup>th</sup> percentile)         | 0.11                                              | 0.30                                              |
| Perceived stress                                         |                                                   |                                                   |
| Moderate/low symptomology (<90 <sup>th</sup> percentile) | 0.78                                              | 0.66                                              |
| High symptomology (≥90 <sup>th</sup> percentile)         | 0.22                                              | 0.34                                              |
| Stressful life events                                    |                                                   |                                                   |
| 0-3 events (<90 <sup>th</sup> percentile)                | 0.87                                              | 0.58                                              |
| 4 or more events (≥90 <sup>th</sup> percentile)          | 0.13                                              | 0.42                                              |
| Resilience                                               |                                                   |                                                   |
| Moderate/high (>10 <sup>th</sup> percentile)             | 0.91                                              | 0.66                                              |
| Low (≤10 <sup>th</sup> percentile)                       | 0.09                                              | 0.34                                              |
| Partner support                                          |                                                   |                                                   |
| Moderate/high (>10 <sup>th</sup> percentile)             | 0.88                                              | 0.65                                              |
| Low (≤10 <sup>th</sup> percentile)                       | 0.12                                              | 0.35                                              |
| Friend and family support                                |                                                   |                                                   |
| Moderate/high (>10 <sup>th</sup> percentile)             | 0.81                                              | 0.46                                              |
| Low (≤10 <sup>th</sup> percentile)                       | 0.19                                              | 0.54                                              |

**eTable 5: Fit indices for the latent class analysis using psychometric measure scores at 75<sup>th</sup> percentile (anxiety and stress) and 25<sup>th</sup> percentile (low psychosocial resources)**

| <b>Fit statistic</b>     | <b>Latent class model</b> |                |                |                |
|--------------------------|---------------------------|----------------|----------------|----------------|
|                          | <b>2 Class</b>            | <b>3 Class</b> | <b>4 Class</b> | <b>5 Class</b> |
| Log-likelihood           | -3349.0                   | 3322.3         | -3299.3        | 3286.3         |
| AIC                      | 357.0                     | 321.6          | 293.6          | 285.6          |
| BIC                      | 436.4                     | 443.0          | 457.0          | 491.0          |
| Sample-size adjusted BIC | 382.4                     | 360.4          | 345.9          | 351.2          |
| Entropy                  | 0.75                      | 0.73           | 0.69           | 0.70           |

Abbreviations: AIC=Akaike information criterion, BIC=Bayesian information criterion

**eTable 6: Conditional probabilities of latent class membership using psychometric measure scores at 75<sup>th</sup> percentile (anxiety and stress) and 25<sup>th</sup> percentile (low psychosocial resources)**

|                                                          | <b>Class 1</b>                         | <b>Class 2</b>                      | <b>Class 3</b>                                           | <b>Class 4</b>                                                        |
|----------------------------------------------------------|----------------------------------------|-------------------------------------|----------------------------------------------------------|-----------------------------------------------------------------------|
|                                                          | <b>High perceived stress<br/>n=357</b> | <b>Low social support<br/>n=217</b> | <b>High general anxiety and low resilience<br/>n=122</b> | <b>High anxiety, high stress, low psychosocial resources<br/>n=91</b> |
| Depressive symptoms                                      |                                        |                                     |                                                          |                                                                       |
| No probable depression (<13)                             | 1.00                                   | 0.93                                | 0.25                                                     | 0.71                                                                  |
| Probable depression (≥13)                                | 0.00                                   | 0.07                                | 0.75                                                     | 0.29                                                                  |
| General anxiety                                          |                                        |                                     |                                                          |                                                                       |
| Moderate/low symptomology (<75 <sup>th</sup> percentile) | 0.98                                   | 0.83                                | 0.02                                                     | 0.95                                                                  |
| High symptomology (≥75 <sup>th</sup> percentile)         | 0.02                                   | 0.17                                | 0.98                                                     | 0.05                                                                  |
| Pregnancy-related anxiety                                |                                        |                                     |                                                          |                                                                       |
| Moderate/low symptomology (<75 <sup>th</sup> percentile) | 0.94                                   | 0.93                                | 0.53                                                     | 0.20                                                                  |
| High symptomology (≥75 <sup>th</sup> percentile)         | 0.06                                   | 0.07                                | 0.47                                                     | 0.80                                                                  |
| Perceived stress                                         |                                        |                                     |                                                          |                                                                       |
| Moderate/low symptomology (<75 <sup>th</sup> percentile) | 0.80                                   | 0.82                                | 0.53                                                     | 0.44                                                                  |
| High symptomology (≥75 <sup>th</sup> percentile)         | 0.20                                   | 0.18                                | 0.47                                                     | 0.56                                                                  |
| Recent experience of stressful life events               |                                        |                                     |                                                          |                                                                       |
| 0-3 events (<75 <sup>th</sup> percentile)                | 0.95                                   | 0.79                                | 0.48                                                     | 1.00                                                                  |
| 4 or more events (≥75 <sup>th</sup> percentile)          | 0.05                                   | 0.21                                | 0.52                                                     | 0.00                                                                  |
| Resilience                                               |                                        |                                     |                                                          |                                                                       |
| Moderate/high (>75 <sup>th</sup> percentile)             | 1.00                                   | 0.75                                | 0.52                                                     | 0.99                                                                  |
| Low (≤75 <sup>th</sup> percentile)                       | 0.00                                   | 0.25                                | 0.48                                                     | 0.01                                                                  |
| Partner support                                          |                                        |                                     |                                                          |                                                                       |
| Moderate/high (>25 <sup>th</sup> percentile)             | 0.97                                   | 0.83                                | 0.62                                                     | 0.44                                                                  |
| Low (≤25 <sup>th</sup> percentile)                       | 0.03                                   | 0.17                                | 0.38                                                     | 0.56                                                                  |
| Friend and family support                                |                                        |                                     |                                                          |                                                                       |
| Moderate/high (>25 <sup>th</sup> percentile)             | 0.93                                   | 0.58                                | 0.30                                                     | 0.84                                                                  |
| Low (≤25 <sup>th</sup> percentile)                       | 0.07                                   | 0.42                                | 0.70                                                     | 0.16                                                                  |

**eTable 7: Fit indices for latent class analyses of adverse psychosocial factors among women in the first and second halves of pregnancy**

| <b>Fit statistic</b>     | <b>Latent class model</b> |                |                |                |
|--------------------------|---------------------------|----------------|----------------|----------------|
|                          | <b>2 Class</b>            | <b>3 Class</b> | <b>4 Class</b> | <b>5 Class</b> |
| Log-likelihood           | -1646.4                   | -1623.3        | -1604.5        | -1588.5        |
| AIC                      | 376.2                     | 366.1          | 364.5          | 368.5          |
| BIC                      | 528.5                     | 598.9          | 677.9          | 762.4          |
| Sample-size adjusted BIC | 420.5                     | 433.8          | 455.7          | 483.0          |
| Entropy                  | 0.89                      | 0.71           | 0.82           | 0.82           |
